# Supplementary material
Source: PubMed Central journal article supplement (PMC4789967)
Supplement: khuk002373.ww1_default.pdf [file khuk002373.ww1_default.pdf]

## Quality of life

| Outcomes                                  | Intervention<br>Median (IQR) | Control<br>Median (IQR) | Model summary<br>Coefficient *<br>(95% CI) | p-value |
|-------------------------------------------|------------------------------|-------------------------|--------------------------------------------|---------|
| Overall satisfaction with quality of life |                              |                         |                                            |         |
| 3 years                                   | 4.0 (4 to 4)                 | 4.0 (4 to 5)            | -0.04 (-0.17 to 0.08)                      | 0.48    |
| Overall satisfaction with health          |                              |                         |                                            |         |
| 3 years                                   | 4.0 (3 to 4)                 | 4.0 (3 to 4)            | -0.01 (-0.20 to 0.18)                      | 0.94    |
| Physical quality of life                  |                              |                         |                                            |         |
| 3 years                                   | 26.0 (22 to 29)              | 25.5 (22 to 29)         | -0.15 (-0.84 to 0.55)                      | 0.68    |
| Psychological quality of life             |                              |                         |                                            |         |
| 3 years                                   | 23.0 (20 to 25)              | 23.0 (20 to 25)         | -0.10 (-0.61 to 0.42)                      | 0.71    |
| Social quality of life                    |                              |                         |                                            |         |
| 3 years                                   | 11.0 (9 to 12)               | 11.0 (10 to 12)         | 0.05 (-0.37 to 0.47)                       | 0.81    |
| Environmental quality of life             |                              |                         |                                            |         |
| 3 years                                   | 31.0 (28 to 34)              | 31.0 (28 to 34)         | -0.01 (-0.67 to 0.65)                      | 0.98    |

\*The coefficient represents the increase in mean in the intervention group compared to the control group. Estimates are derived using robust generalised estimating equations (GEE). Results are adjusted for baseline values and clusters effect.
